# Supplementary material for: Childhood Maltreatment and Longitudinal Epigenetic Aging: NIMHD Social Epigenomics Program
Source: PubMed Central journal article supplement (PMC11287393; doi:10.1001/jamanetworkopen.2024.21877), 2024-07-29
Supplement: jamanetwopen-e2421877-s002.pdf [file jamanetwopen-e2421877-s002.pdf]

## Data Sharing Statement

Chang. Childhood Maltreatment and Longitudinal Epigenetic Aging. *JAMA Netw Open*.  
Published July 29, 2024. doi:10.1001/jamanetworkopen.2024.21877

### Data

**Data available:** Yes

**Data types:** Deidentified participant data

**How to access data:** Data from the Future Families and Child Wellbeing Study is publicly available at: <https://ffcws.princeton.edu/>

**When available:** With publication

### Supporting Documents

**Document types:** None

### Additional Information

**Who can access the data:** Researchers who request the data

**Types of analyses:** For any research purpose

**Mechanisms of data availability:** with a signed data access agreement
